# Supplementary material
Source: HighWire-hosted journal article supplement (http://www.jneurosci.org/highwire/filestream/599163/field_highwire_adjunct_files/0/Supplemental_Legend.pdf)
Supplement: Supplemental_Legend.pdf [file Supplemental_Legend.pdf]

**Supplementary Figure 1. Normal neural development of the trigeminal ganglia in the NF1 mutant mice.** hGFAP-Cre mediates recombination in the trigeminal ganglion (**a**, X-gal staining is on P35 R26; hGFAP-Cre mice), however NF1 ablation does not lead to gross morphological abnormality of the trigeminal ganglia (**c-d**), nor the number of neurons (**b**). Scale bar is 10um.

**Supplementary Figure 2. Lack of cortical barrels throughout the entire somatosensory cortex in neurofibromin mutant mice.** Tangential sections (50  $\mu\text{m}$ ) of the entire somatosensory cortex from dorsal to ventral illustrate the extent of barrel segregation from two separate control mice at P35 (**a-f** and **g-i**). This segregation is reduced in neurofibromin conditional mutant mice (**m-r** and **s-x**).

**Supplementary Figure 3. Degree of cortical segregation is reduced in NF1 mutant.** The degree of cortical segregation was determined from P30-35 DAPI stained tangential sections in control and mutant cortex (**a**). The measurement is given in arbitrary units (AU). Counts of DAPI stained puncta show similar numbers in control and mutant young adult cortex (**b**).

**Supplementary Figure 4. Serotonin immunostaining and DAPI staining in P8 control and mutant cortex.** Low magnification (1.5X) images of serotonin staining reveal various cortical sensory regions in both control (**a**) and mutant cortex (**b**). The visual (V), limb (L), lower lip (LP), and barrel cortex (B) regions are clearly seen in both animals. DAPI staining shows segregation of cortical barrels in the control (**c**) that is absent in the mutant (**d**).
